# Supplementary material for: Efficient and stable CF4 decomposition over θ-Al2O3 with extraordinary resistance to HF
Source: Royal Society of Chemistry journal article supplement (doi:10.1039/d3en00424d), 2023-01-01
Supplement: d3en00424d1.pdf [file d3en00424d1.pdf]

## Supporting Information

### **Efficient and stable CF<sub>4</sub> decomposition over $\theta$ -Al<sub>2</sub>O<sub>3</sub> with extraordinary resistance to HF**

Hang Zhang<sup>a</sup>, Kang Liu<sup>a,b,c</sup>, Yingkang Chen<sup>a</sup>, Xiaojian Wang<sup>a</sup>, Hongmei Li,<sup>a,d</sup> Junwei Fu<sup>a</sup>, Liyuan Chai<sup>b,c</sup>, Zhang Lin<sup>b,c</sup>, and Min Liu<sup>a\*</sup>

<sup>a</sup>Hunan Joint International Research Center for Carbon Dioxide Resource Utilization, School of Physics and Electronics, Central South University, Changsha 410083, Hunan, P.R. China

<sup>b</sup>School of Metallurgy and Environment, Central South University, Changsha 410083, Hunan, P.R. China

<sup>c</sup>Chinese National Engineering Research Center for Control & Treatment of Heavy Metal Pollution, Changsha 410083, Hunan, P.R. China

<sup>d</sup>School of Materials Science and Engineering, Zhengzhou University, Zhengzhou 450002, Henan, P.R. China

\*Corresponding author: Prof. Min Liu

Hunan Joint International Research Center for Carbon Dioxide Resource Utilization, School of Physics and Electronics, Central South University, Changsha 410083, Hunan, P.R. China

E-mail: [minliu@csu.edu.cn](mailto:minliu@csu.edu.cn)

The Supporting Information includes 9 pages, 2 tables and 6 figures.

**Table S1** Kinetic parameters for HF corrosion onto  $\gamma$ -Al<sub>2</sub>O<sub>3</sub>,  $\theta$ -Al<sub>2</sub>O<sub>3</sub> and  $\alpha$ -Al<sub>2</sub>O<sub>3</sub>

| corrode                                  | kinetic model             | model parameter                        |                                                |                                                              |                                                | R <sup>2</sup> |
|------------------------------------------|---------------------------|----------------------------------------|------------------------------------------------|--------------------------------------------------------------|------------------------------------------------|----------------|
|                                          |                           | k <sub>1</sub><br>(min <sup>-1</sup> ) | q <sub>e,calc,1</sub><br>(mg g <sup>-1</sup> ) | k <sub>2</sub><br>(g mg <sup>-1</sup><br>min <sup>-1</sup> ) | q <sub>e,calc,2</sub><br>(mg g <sup>-1</sup> ) |                |
| $\gamma$ -Al <sub>2</sub> O <sub>3</sub> | Pseudo-first-order model  | 0.5310                                 | 482.32                                         |                                                              |                                                | 0.9930         |
|                                          | Pseudo-second-order model |                                        |                                                | 1.34×10 <sup>-3</sup>                                        | 503.92                                         | 0.9994         |
| $\theta$ -Al <sub>2</sub> O <sub>3</sub> | Pseudo-first-order model  | 0.0062                                 | 391.48                                         |                                                              |                                                | 0.9874         |
|                                          | Pseudo-second-order model |                                        |                                                | 1.90×10 <sup>-5</sup>                                        | 415.53                                         | 0.9876         |
| $\alpha$ -Al <sub>2</sub> O <sub>3</sub> | Pseudo-first-order model  | 0.0025                                 | 242.62                                         |                                                              |                                                | 0.9867         |
|                                          | Pseudo-second-order model |                                        |                                                | 1.30×10 <sup>-5</sup>                                        | 265.24                                         | 0.9901         |

**Table S2** The stability comparison between  $\gamma$ -Al<sub>2</sub>O<sub>3</sub> and  $\theta$ -Al<sub>2</sub>O<sub>3</sub> catalysts in previous literature

| catalysts                                | reaction temperature | initial CF <sub>4</sub> decomposition % | CF <sub>4</sub> decomposition % (20 h) | CF <sub>4</sub> decomposition % (50 h) | CF <sub>4</sub> decomposition % (100 h) | Ref.                   |
|------------------------------------------|----------------------|-----------------------------------------|----------------------------------------|----------------------------------------|-----------------------------------------|------------------------|
| $\theta$ -Al <sub>2</sub> O <sub>3</sub> | 750 °C               | 100                                     | 100                                    | 100                                    | 100                                     | This work <sup>a</sup> |
| $\gamma$ -Al <sub>2</sub> O <sub>3</sub> | 750 °C               | 100                                     | 64                                     | -                                      | -                                       | 18 <sup>b</sup>        |
| $\gamma$ -Al <sub>2</sub> O <sub>3</sub> | 700 °C               | 48                                      | 32                                     | 14                                     | -                                       | 19 <sup>c</sup>        |
| $\gamma$ -Al <sub>2</sub> O <sub>3</sub> | 750 °C               | 100                                     | 80                                     | 40                                     | -                                       | 31 <sup>b</sup>        |

a: 0.5% CF<sub>4</sub>, 1.0 g catalyst, a gas hourly space velocity of 2,000 h<sup>-1</sup>;

b: 0.7% CF<sub>4</sub>, 1.0 g catalyst, a gas hourly space velocity of 2,000 h<sup>-1</sup>;

c: 0.7% CF<sub>4</sub>, 1.0 g catalyst, a gas hourly space velocity of 2,000 h<sup>-1</sup>.

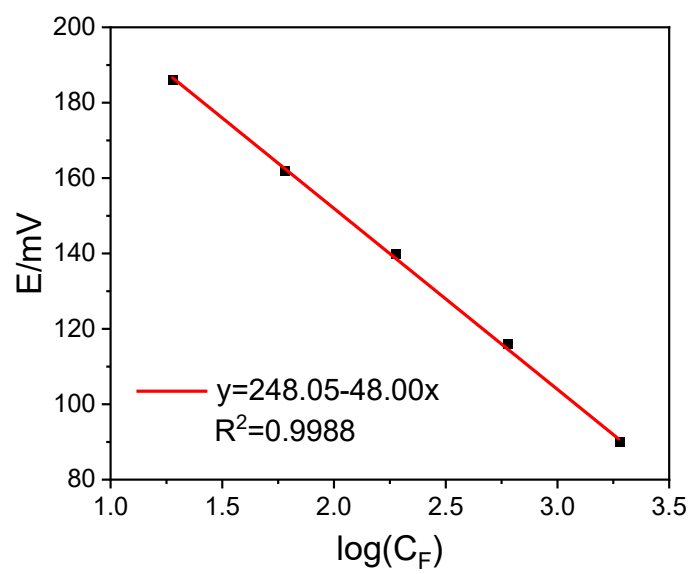

**Figure S1.**  $F^-$  standard curve.

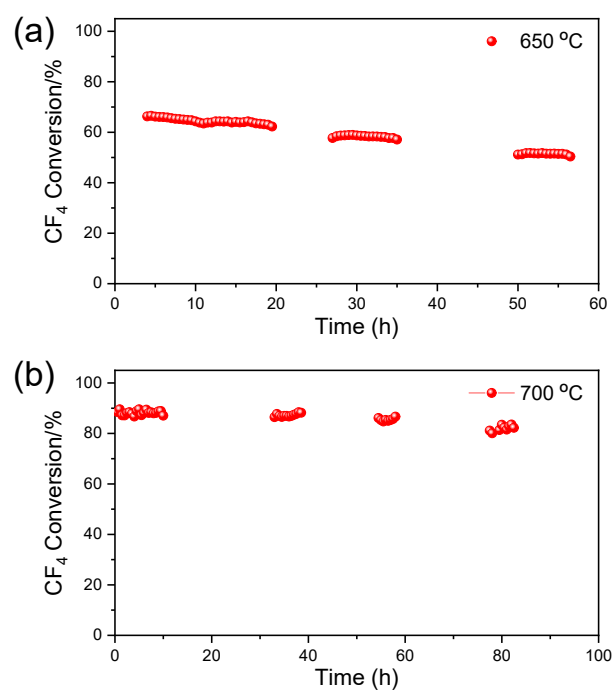

**Figure S2.** CF<sub>4</sub> decomposition rate % in decomposition reaction as a function of time-on-stream over  $\theta$ -Al<sub>2</sub>O<sub>3</sub> under (a) 650 °C and (b) 700 °C.

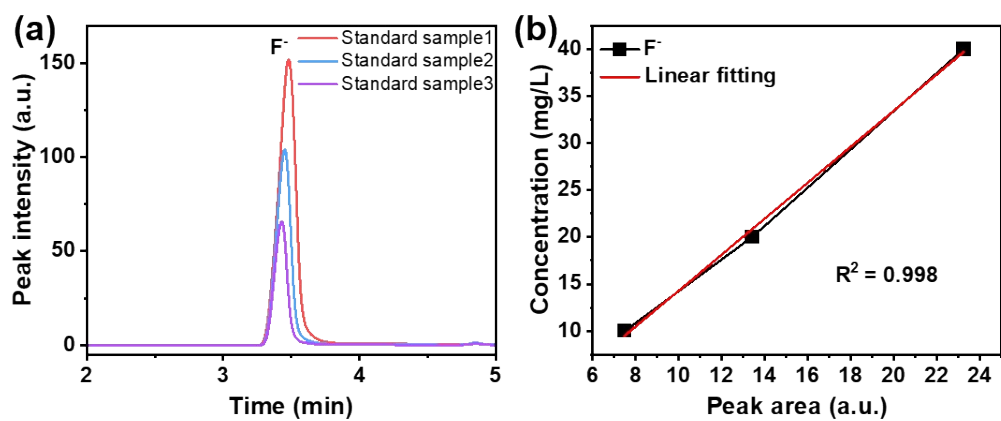

**Figure S3.** (a) The F content standard curve and (b) linear fitting of F content with peak area.

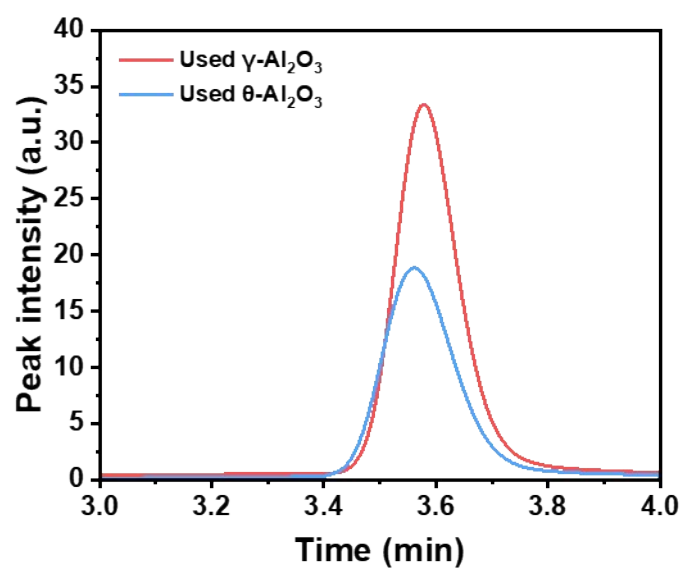

**Figure S4.** The IC spectra of the used  $\gamma$ -Al<sub>2</sub>O<sub>3</sub> and  $\theta$ -Al<sub>2</sub>O<sub>3</sub> sample.

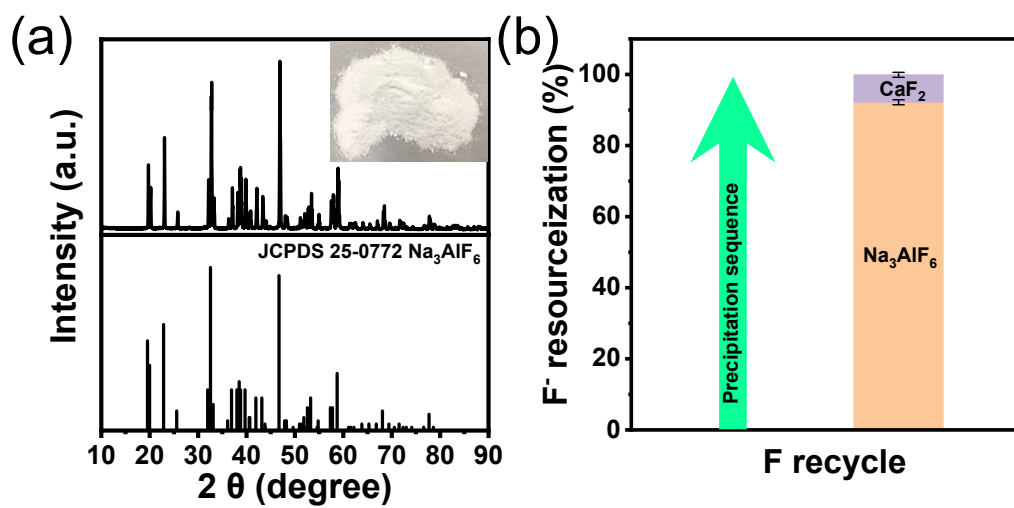

**Figure S5.** (a) The XRD pattern of the obtained Na<sub>3</sub>AlF<sub>6</sub> by recycling F<sup>-</sup>. (b) F<sup>-</sup> resource utilization rate (%) as Na<sub>3</sub>AlF<sub>6</sub> and CaF<sub>2</sub>.



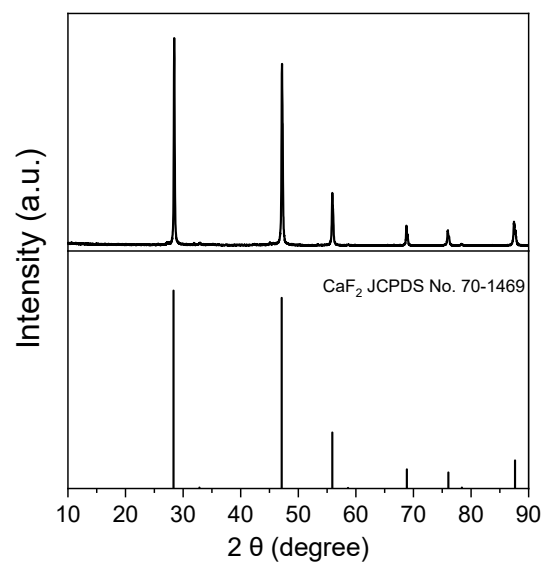

**Figure S6.** The XRD pattern of CaF<sub>2</sub>.

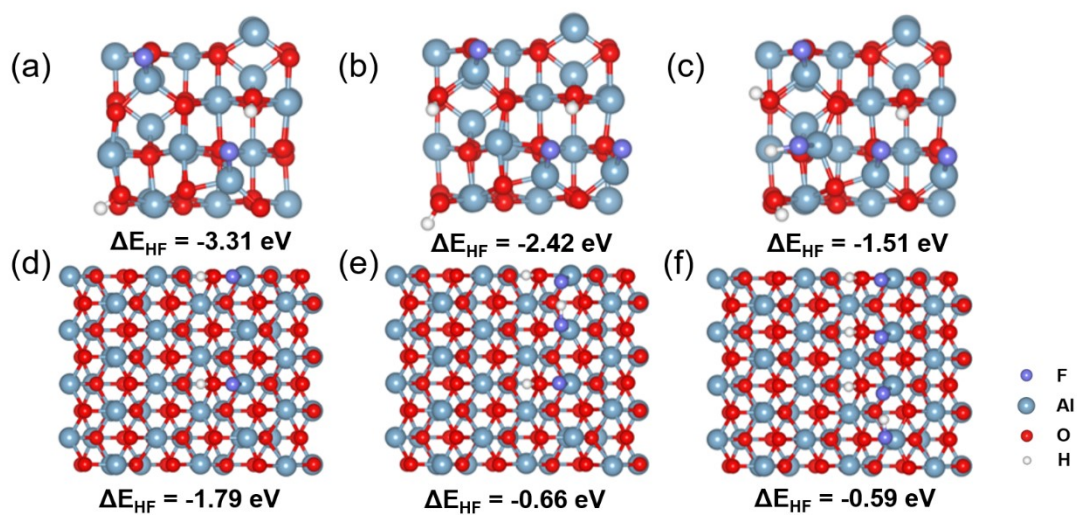

**Figure S7.** (a-c) two, three and four HF molecules adsorbed the surface of  $\gamma$ - $\text{Al}_2\text{O}_3$ .

(d-f) two, three and four HF molecules adsorbed the surface of  $\theta$ - $\text{Al}_2\text{O}_3$ .
